# Supplementary material
Source: PubMed Central journal article supplement (PMC3109435)
Supplement: NIHMS290044-supplement-01.pdf [file NIHMS290044-supplement-01.pdf]

Current Biology, Volume 21

## **Supplemental Information**

### **KNL1/Spc105 Recruits PP1 to Silence**

### **the Spindle Assembly Checkpoint**

Jessica S. Rosenberg, Frederick R. Cross, and Hironori Funabiki

## **Supplemental Inventory**

### **1. Supplemental Figures, Tables, and Movies**

Figure S1, related to Figure 1

Figure S2, related to Figure 2

Figure S3, related to Figure 3

Figure S4, related to Figure 4

Movies S1–S3, related to Figure 1 (see separate .avi files)

Movies S4 and S5, related to Figure 3 (see separate .avi files)

Table S1

Table S2

### **2. Supplemental Experimental Procedures**

### **3. Supplemental References**

figure S1

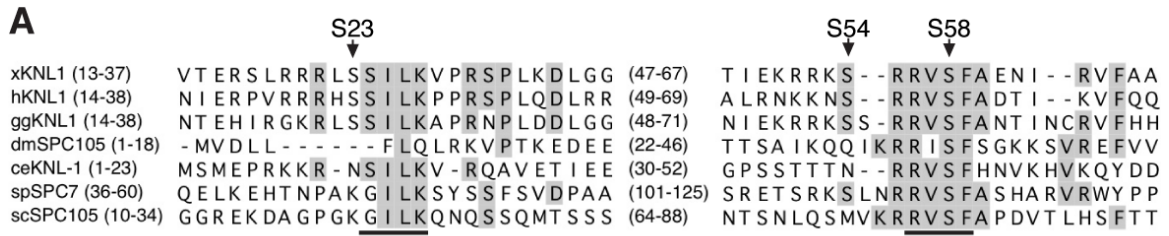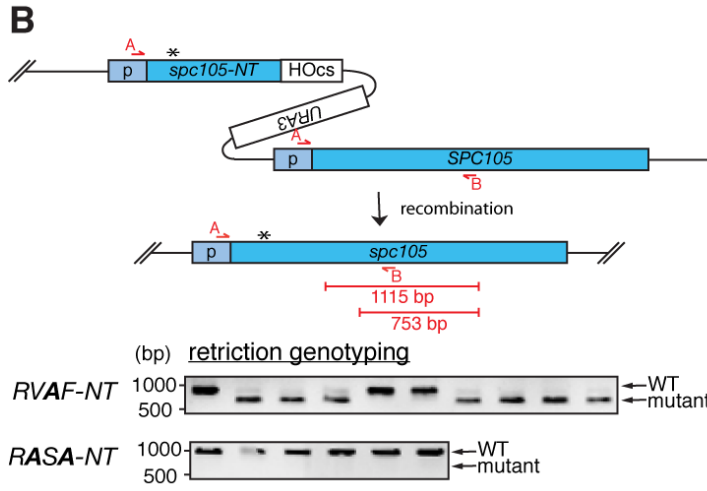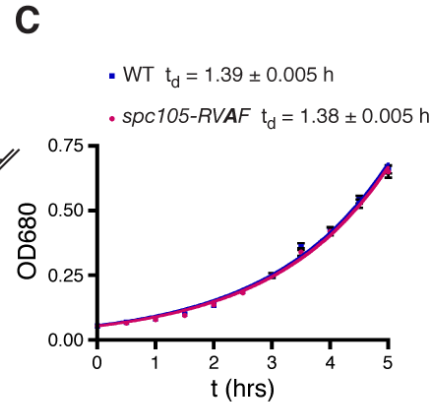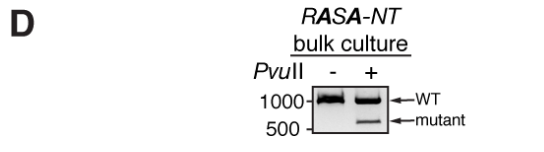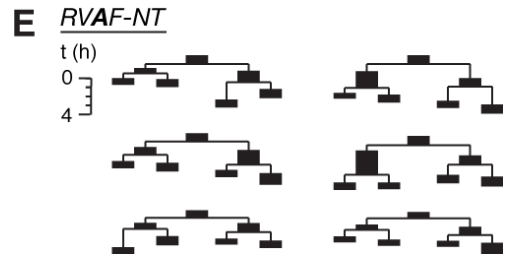

**Figure S1. Genotyping of HGR Recombinants, Related to Figure 1**

(A) Alignment of the SILK and RVxF motifs of KNL1 orthologs from *X. tropicalis* (xKNL1), *H. sapiens* (hKNL1), *G. gallus* (ggKNL1), *D. melanogaster* (dmSPC105), *C. elegans* (ceKNL-1), *S. pombe* (spSPC7), and *S. cerevisiae* (scSPC105). Arrows indicate S23, S54, and S58 of xKNL1.

(B) Representative genotyping of the single cell assay in 3B. The genomic *SPC105* locus was PCR amplified from recombinant colonies using the indicated primers A and B (red arrows), digested with mutation-specific restriction enzymes and resolved on an agarose gel.

(C) Growth curve of WT and *spc105-RVAF* at 30°C in YEPD medium. Average  $\pm$  SEM of the doubling time of three independent experiments are also shown.

(D) Six hours after induction of HGR in the parent strain harboring the *RASA-NT* cassette, the genomic *SPC105* locus was PCR amplified from bulk culture and digested with *PvuII* to detect generation of *spc105-RASA*.

(E) Pedigree analysis of recombinants generated from the cells harboring the *RVAF-NT* cassette during live cell imaging (Movie S1). Each lineage starts from a single unbudded cell and the duration of budding to anaphase (black rectangle) and anaphase to budding (line) were measured for three generations. At each division, fates of the mother cell and the daughter cell are shown on the left and right, respectively.

figure S2

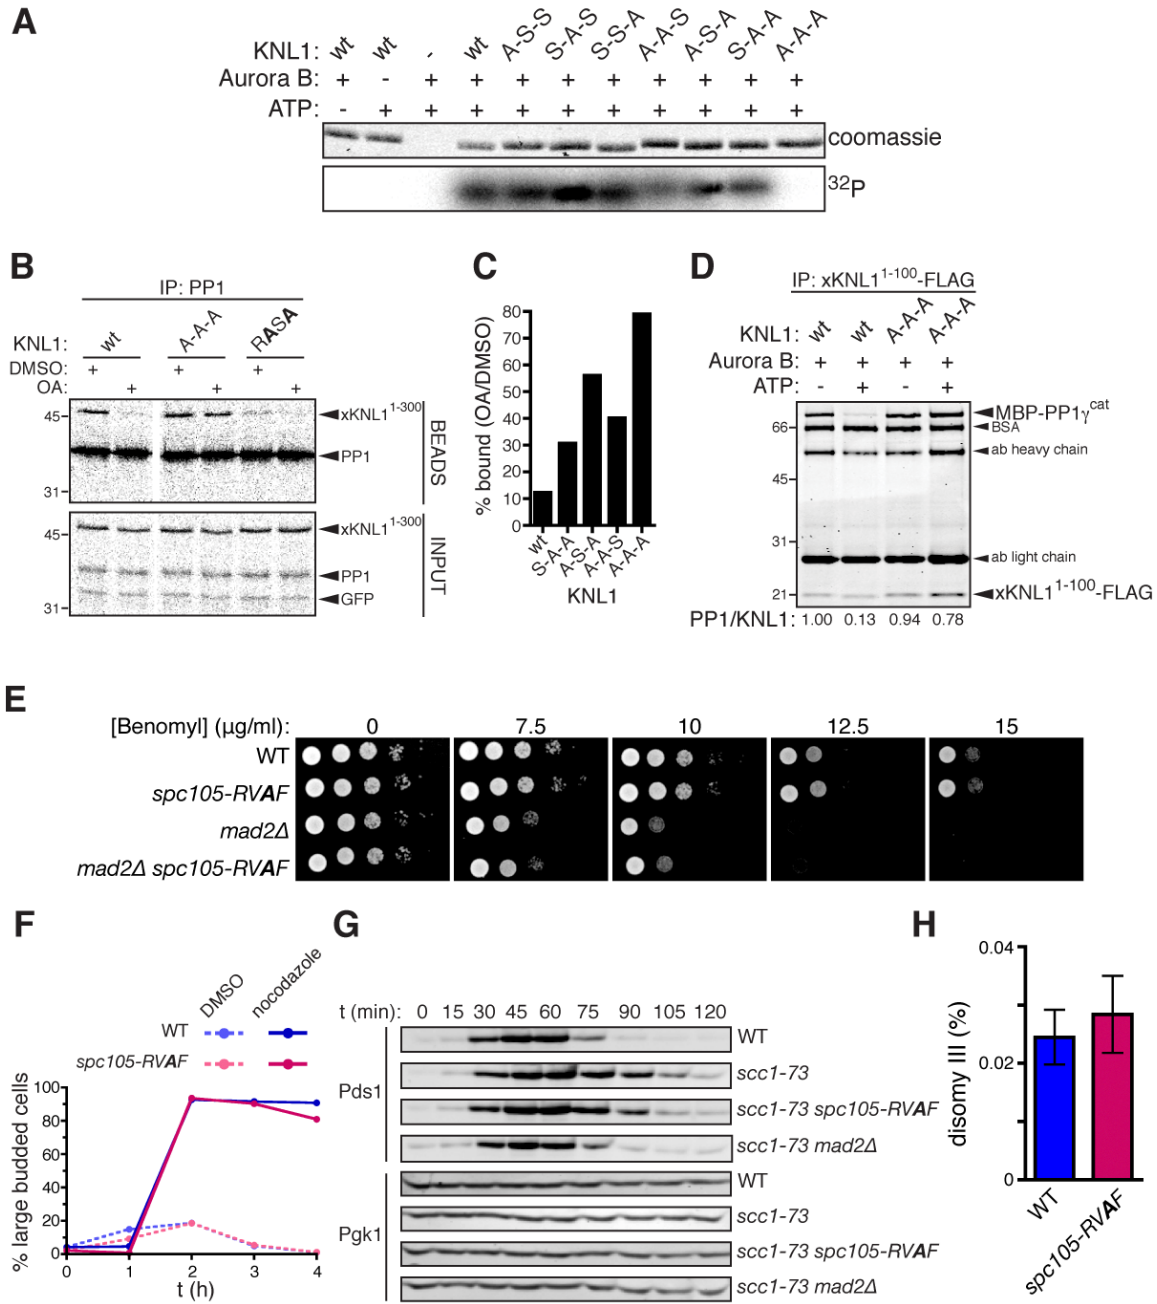

**Figure S2. Phosphorylation of the RVSF Motif of KNL1/Spc105 Can Abrogate PP1/Glc7 Binding but Is Dispensable for Mitosis, Related to Figure 2**

(A)  $\gamma$ - $^{32}\text{P}$ -ATP and recombinant Aurora B-INCENP<sub>790-871</sub> were incubated with N-terminal region of *Xenopus tropicalis* KNL1 (xKNL1<sup>1-100</sup>-FLAG, a recombinant protein of the N-terminal 100 residues) containing various serine (S) to alanine (A) mutations as indicated at residues 23, 54, and 58 respectively. Coomassie staining of xKNL1<sup>1-100</sup>-FLAG and autoradiography are shown. Only the A-A-A mutant completely abolished  $^{32}\text{P}$  incorporation, indicating that all the three serine residues can be phosphorylated by Aurora B.

(B) Metaphase *Xenopus laevis* egg extracts, containing  $^{35}\text{S}$ -labeled PP1 (positive control), GFP (negative control), and xKNL1<sup>1-300</sup> (the N-terminal 300 residues of xKNL1), xKNL1<sup>1-300,A-A-A</sup>, or xKNL1<sup>1-300,RASA</sup>, were treated with 0.4  $\mu\text{M}$  okadaic acid (OA), which inhibits phosphatases antagonizing Aurora B and thus induces phosphorylation of KNL1 (data not shown), or with DMSO.  $^{35}\text{S}$ -labeled proteins coimmunoprecipitated with anti-PP1 antibody (BEADS) were visualized by autoradiography. The RASA mutation weakened the interaction with PP1, whereas the A-A-A mutation (S23A S54A S58A) desensitized the OA-induced PP1 dissociation.

(C) Phosphorylation at S23, S54 and S58 of xKNL1 additively weakens the binding of xKNL1 to PP1. Anti-PP1 coimmunoprecipitation was performed as in (B) with xKNL1<sup>1-300</sup> with the indicated serine (S) to alanine (A) mutations at residues 23, 54, and 58 respectively. Relative, normalized % ratios of KNL1 proteins copurified with PP1 from extracts treated with OA versus DMSO are shown.

(D) xKNL1<sup>1-100</sup>-FLAG was treated with recombinant Aurora B-INCENP<sub>790-871</sub> in the presence or absence of ATP. xKNL1<sup>1-100</sup>-FLAG was then isolated with anti-FLAG beads,

and incubated with 1  $\mu$ M MBP-PP1 $\gamma^{\text{cat}}$  (the catalytically dead D95A mutant [26]). Fractions bound to the beads were visualized with Coomassie. Normalized PP1/KNL1 ratio is indicated below. Aurora B phosphorylation of xKNL1<sup>1-100,wt</sup>-FLAG reduced binding of MBP-PP1 $\gamma^{\text{cat}}$  eight fold, but the binding with xKNL1<sup>1-100,A-A-A</sup>-FLAG was resistant to Aurora B treatment.

(E) Ten-fold serial dilutions of WT, *spc105-RVAF*, *mad2 $\Delta$* , and *mad2 $\Delta$  spc105-RVAF* were plated on YEPD with the indicated concentrations of benomyl.

(F) G1 synchronized WT and *spc105-RVAF* cells were released into nocodazole. The number of large budded cells was counted at the indicated timepoints, n > 500 cells each.

(G) WT, *scc1-73*, *scc1-73 spc105-RVAF*, and *scc1-73 mad2 $\Delta$*  cells were G1 synchronized at the permissive temperature (23°C), released to the restrictive temperature (37°), and Pds1 and Ptk1 (loading control) levels were monitored by Western blotting at the indicated timepoints after release.

(H) Disomy III formation in WT and *spc105-RVAF* cells containing a chromosome III marked with a *leu2* locus disrupted by *URA3*. The mean frequency  $\pm$  SEM of disomy formation (assessed by generation Leu<sup>+</sup>, Ura<sup>+</sup> colonies) from five independent cultures are shown.

figure S3

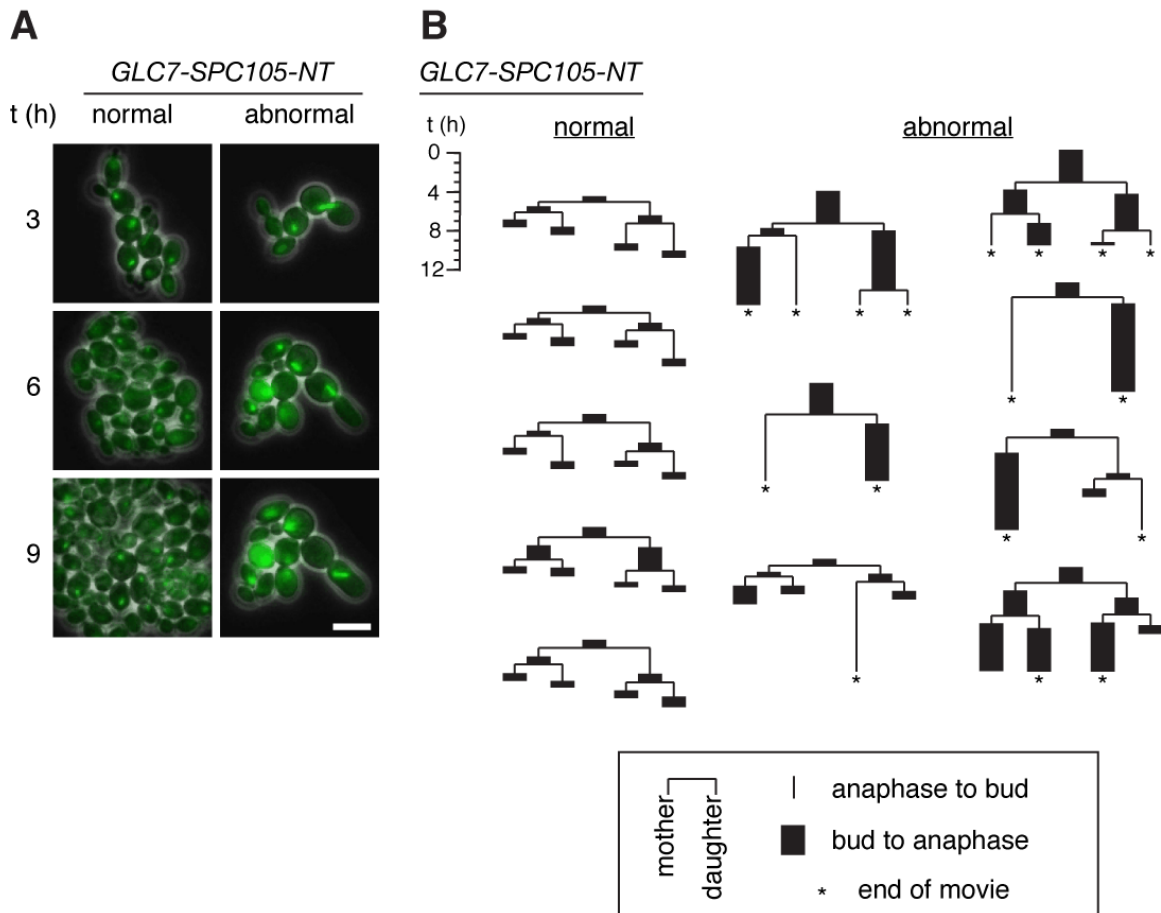

**Figure S3. Live Microscopy of *GLC7-SPC105* Lethality, Related to Figure 3**

(A) Time-lapse microscopy of GFP-Tub1 (green) was performed on *GLC7-SPC105-NT* cells beginning 6 hours after *GAL-HO* induction. Scale bar, 10  $\mu$ m.

(B) Pedigree analysis of recombinants generated from cells harboring the *GLC7-SPC105-NT* cassette during live cell imaging (Movie S4, S5). Representative lineages showing normal cell divisions (left 6 examples) and abnormal cell divisions (right 5 examples) are shown.

figure S4

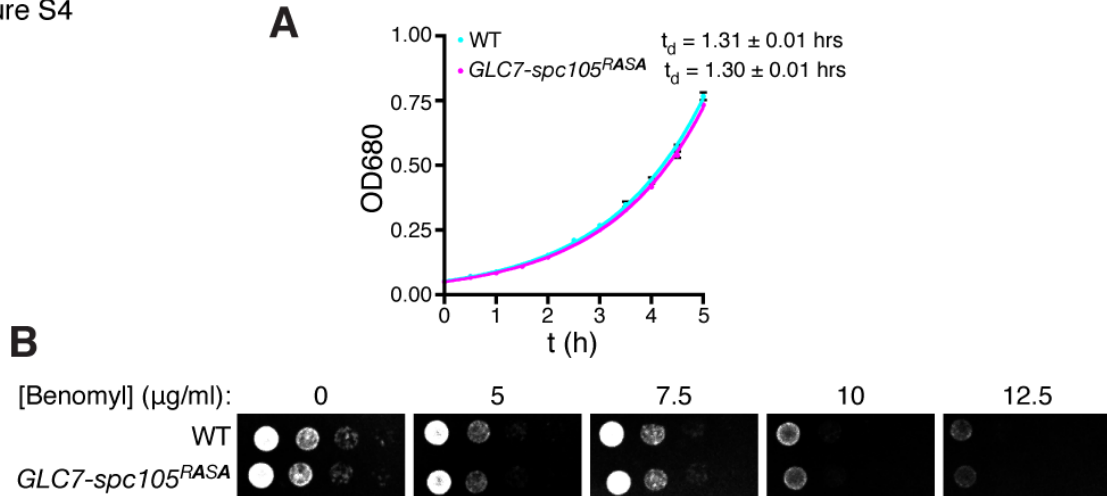

**Figure S4. Characterization of *GLC7-SPC105<sup>RASA</sup>*, Related to Figure 4**

(A) Growth curve of WT and *GLC7-spc105<sup>RASA</sup>* cells at 30°C in YEPD medium. Average  $\pm$  SEM of the doubling time of three independent experiments are also shown.

(B) Ten-fold serial dilutions of WT and *GLC7-spc105<sup>RASA</sup>* on YEPD with the indicated concentrations of benomyl.



**Movie S1. Time-Lapse Microscopy of GFP-Tub1 (green) of *RVAF-NT* Cells after Recombination, Related to Figure 1**

Movie duration: 12 hours.

**Movie S2. Time-Lapse Microscopy of GFP-Tub1 (green) of *RASA-NT* Cells after Recombination, Related to Figure 1**

A representative “normal” cell is shown. Movie duration: 12 hours.

**Movie S3. Time-Lapse Microscopy of GFP-Tub1 (green) of *RASA-NT* Cells after Recombination, Related to Figure 1**

A representative “abnormal” cell is shown, exhibiting long metaphase delays. Movie duration: 12 hours.

**Movie S4. Time-Lapse Microscopy of GFP-Tub1 (green) of *GLC7-SPC105-NT* Cells after Recombination, Related to Figure 3**

A representative “normal” cell is shown. Movie duration: 12 hours.

**Movie S5: Time-Lapse Microscopy of GFP-Tub1 (green) of *GLC7-SPC105-NT* Cells after Recombination, Related to Figure 3**

A representative “abnormal” cell is shown, exhibiting a pleiotropic cell cycle phenotype.

Movie duration: 12 hours.

| Name                        | sequence                                                               | purpose                                                                                       |
|-----------------------------|------------------------------------------------------------------------|-----------------------------------------------------------------------------------------------|
| MBP-PP1gamma_F              | CGGATCCGCAGATGTTGACAAGCTCAAC                                           | Cloning PP1 $\gamma$ into pMAL-c4g (5')                                                       |
| MBP-PP1gamma_R              | CCGAAGCTTTTATTTCTTTGCTTGTGTTTGTGATTATGCC                               | Cloning PP1 $\gamma$ into pMAL-c4g (3')                                                       |
| GST-Blink100_F              | GCGGATCCGATGGCAATCCTTGGCTACAAG                                         | Cloning xKNL1 <sup>1-100</sup> into pGEX-6p2 (5')                                             |
| GST-Blink100_R              | GGAATTCCTTACTTGTTCATCGTCCTTGTAGTCGCTTCCAGTGA<br>TCTGGCAGCTAGATTC       | Cloning xKNL1 <sup>1-100</sup> into pGEX-6p2 (3')                                             |
| PP1g_D95A_s                 | CCTAGGAGACTATGTAGCTCGAGGCAAGCAGTCT                                     | PP1 $\gamma$ D95A mutation (sense)                                                            |
| PP1g_D95A_as                | AGACTGCTTGCCTCGAGCTACATAGTCTCCTAGG                                     | PP1 $\gamma$ D95A mutation (antisense)                                                        |
| Blinkin_RASA_sense          | GCGGAGAAAAAGTCGTCGAGCTAGCGCTGCTGAGAATATA<br>AGGGTTT                    | xKNL1 RASA mutation (sense)                                                                   |
| Blinkin_RASA_antisense      | AAACCCTTATATTCTCAGCAGCGCTAGCTCGACGACTTTTTCTCCGC                        | xKNL1 RASA mutation (antisense)                                                               |
| BlinkinS23A_sense           | AGCCTCAGGAGGCGACTTGCCTCTATTTTAAAAGTTC                                  | xKNL1 S23A mutation (sense)                                                                   |
| BlinkinS23A_antisense       | GAACTTTTAAAATAGAGGCAAGTCGCCTCCTGAGGCT                                  | xKNL1 S23A mutation (antisense)                                                               |
| BlinkinS54A_sense           | GATTCAACCATTGAAAAGCGGAGAAAAGCTCGTCGAGTTA<br>GCT                        | xKNL1 S54A mutation (sense)                                                                   |
| BlinkinS54A_antisense       | AGCTAACTCGACGAGCTTTTCTCCGCTTTTCAATGGTTGAAT<br>C                        | xKNL1 S54A mutation (antisense)                                                               |
| BlinkinS58A_sense           | GGAGAAAAGTCGTCGAGTTGCCTTTGCTGAGAATATAAG<br>GG                          | xKNL1 S58A mutation (sense)                                                                   |
| BlinkinS58A_antisense       | CCCTTATATTCTCAGCAAAGGCAACTCGACGACTTTTTCTCC                             | xKNL1 S58A mutation (antisense)                                                               |
| Blinkin_S54_to_DM_sense     | GGAGAAAAGTCGTCGAGTTGCCTTTGCTGAGAAATTAAG<br>GG                          | xKNL1 S54A, S58A mutation (sense)                                                             |
| Blinkin_S54_to_DM_antisense | CCCTTATATTCTCAGCAAAGGCAACTCGACGAGCTTTTTCTC<br>C                        | xKNL1 S54A, S58A mutation (antisense)                                                         |
| Spc105_SG_F                 | TCCCCGCGGATTATCGAAGCGAAAGTATGGC                                        | Cloning Spc105 synthetic genes into RS406 (5')                                                |
| Spc105_SG_R                 | GGGGTACCGTCAACCACTTACAAAACC                                            | Cloning Spc105 synthetic genes into RS406 (3')                                                |
| spc105_RVAF_wt_s            | TACAGAGTATGGTAAAGAGAAGAGTTTCGTTTCGCTCCCGA                              | Mutating spc105 <sup>NT</sup> construct to WT (sense)                                         |
| spc105_RVAF_wt_as           | TCGGGAGCGAACGAAACTCTTCTTTACCATACTCTGTA                                 | Mutating spc105 <sup>NT</sup> construct to WT (antisense)                                     |
| spc105_sg_seq               | CGCGAAAGAGAAGGCGCC                                                     | Genotyping spc105 (F)                                                                         |
| Spc105_R                    | CGCGAAAGAGAAGGCGCC                                                     | Genotyping spc105 (R)                                                                         |
| spc105_SG_cut_asc1_S        | GATATCTAAGTGGGCTGACGAGCGCGCCGGTGATGGTGCTG<br>GTTTGAATGTGGATGAAAGAAGCCG | Adding Asc1 site and linker to spc105 <sup>NT</sup> constructs for GLC7 insertion (sense)     |
| spc105_SG_cut_asc1_AS       | CGGCTTCTTTTCATCCACATTCAAACCAGCACCATCACGGC<br>GCGCCTGTCAGCCCACTTAGATATC | Adding Asc1 site and linker to spc105 <sup>NT</sup> constructs for GLC7 insertion (antisense) |
| glc7_fus_asc1_F             | CGCGCGGGCGCGCCATGGACTCACAACCAGTTGAC                                    | Cloning GLC7 into spc105 <sup>NT</sup> constructs (5')                                        |
| glc7_fus_asc1_R             | CGCGCGGGCGCGCCCTTTTTTCTTTCTACCCCC                                      | Cloning GLC7 into spc105 <sup>NT</sup> constructs (3')                                        |
| GLC7_salI_QC_a              | CTATTTTTGGGTGATTATGTTGACCGTGGTAAACAATCC                                | Eliminating SalI site in GLC7 (sense)                                                         |
| GLC7_salI_QC_as             | GGATTGTTTACCACGGTCAACATAATCACCCAAAATAG                                 | Eliminating SalI site in GLC7 (antisense)                                                     |
| glc7_D95A_s                 | CTATTTTTGGGTGATTATGTCGCCCGTGGTAAACAATCCTTA<br>GAG                      | GLC7 D94A mutation (sense)                                                                    |
| glc7_D95A_as                | CTCTAAGGATTGTTTACCACGGGCGACATAATCACCCAAA<br>ATAG                       | GLC7 D94A mutation (antisense)                                                                |

**Table S1. List of Primers Used**

| Strain   | Genotype                                                                                                           |
|----------|--------------------------------------------------------------------------------------------------------------------|
| JSR070   | <i>MATa-inc lys2::GAL-HO-LYS2 SPC105::spc105<sup>WT-NT</sup>-URA3</i>                                              |
| JSR002   | <i>MATa-inc lys2::GAL-HO-LYS2 his3::TUB1-GFP-HIS3 SPC105::spc105<sup>RVAF-NT</sup>-URA3 ADE2</i>                   |
| JSR001   | <i>MATa-inc lys2::GAL-HO-LYS2 his3::TUB1-GFP-HIS3 SPC105::spc105<sup>RASA-NT</sup>-URA3 ADE2</i>                   |
| JSR057   | <i>MATa-inc lys2::GAL-HO-LYS2 SPC105::spc105<sup>RASA-NT</sup>-URA3 ipl1-1 TRP1</i>                                |
| JSR069   | <i>MATa-inc lys2::GAL-HO-LYS2 spc105-RASA ipl1-1 TRP1</i>                                                          |
| JSR069-1 | <i>MATa-inc lys2::GAL-HO-LYS2 SPC105 ipl1-1 TRP1</i>                                                               |
| JSR006   | <i>MATa-inc mad2Δ::KanMX lys2::GAL-HO-LYS2 his3::TUB1-GFP-HIS3 SPC105::spc105<sup>RASA-NT</sup>-URA3 ADE2</i>      |
| JSR083   | <i>MATa-inc bar1Δ his3::TUB1-GFP-HIS3 PDS1-18MYC-LEU2 LYS2*</i>                                                    |
| JSR084   | <i>MATa-inc bar1Δ his3::TUB1-GFP-HIS3 PDS1-18MYC-LEU2 LYS2* trp1::tet<sup>off</sup>-CDC20-127-TRP1</i>             |
| JSR085   | <i>MATa-inc bar1Δ his3::TUB1-GFP-HIS3 PDS1-18MYC-LEU2 LYS2* trp1::tet<sup>off</sup>-CDC20-127-TRP1 spc105-RASA</i> |
| JSR004   | <i>MATa-inc lys2::GAL-HO-LYS2 his3::TUB1-GFP-HIS3 SPC105-RVAF ADE2</i>                                             |
| JSR004-1 | <i>MATa-inc lys2::GAL-HO-LYS2 his3::TUB1-GFP-HIS3 SPC105 ADE2</i>                                                  |
| JSR049   | <i>MATa-inc mad2Δ::KanMX lys2::GAL-HO-LYS2 his3::TUB1-GFP-HIS3 spc105-RVAF</i>                                     |
| JSR078   | <i>MATa-inc bar1Δ leu2::tetR-GFP-LEU2 ura3::TetOs-URA3 LYS2*</i>                                                   |
| JSR079   | <i>MATa-inc bar1Δ leu2::tetR-GFP-LEU2 ura3::TetOs-URA3 LYS2* SPC105-RVAF ADE2</i>                                  |
| JSR080   | <i>MATa-inc bar1Δ leu2::tetR-GFP-LEU2 ura3::TetOs-URA3 LYS2* scc1-73 TRP1 ADE2</i>                                 |
| JSR081   | <i>MATa-inc bar1Δ leu2::tetR-GFP-LEU2 ura3::TetOs-URA3 LYS2* SPC105-RVAF scc1-73 TRP1 ADE2</i>                     |
| YL044    | <i>MATa-inc bar1Δ mad2::KanMX scc1-73 leu2::GAL-PDS1-mdb-LEU2</i>                                                  |
| JSR103   | <i>MATa-inc mad2Δ::KanMX lys2::GAL-HO-LYS2 his3::TUB1-GFP-HIS3 spc105-RASA ADE2</i>                                |
| JSR103-1 | <i>MATa-inc mad2Δ::KanMX lys2::GAL-HO-LYS2 his3::TUB1-GFP-HIS3 SPC105 ADE2</i>                                     |
| JSR093   | <i>MATa-inc bar1Δ mad2::KanMX leu2::tetR-GFP-LEU2 ura3::TetOs-URA3</i>                                             |
| JSR094   | <i>MATa-inc bar1Δ mad2::KanMX leu2::tetR-GFP-LEU2 ura3::TetOs-URA3 spc105-RASA</i>                                 |
| JSR096   | <i>MATα lys2::GAL-HO-LYS2 mad2::kanMX leu2-Δ101::URA3::leu2-Δ102 ADE2</i>                                          |
| JSR097   | <i>MATα spc105-RASA lys2::LYS2-GAL-HO mad2::kanMX leu2-Δ101::URA3::leu2-Δ102 ADE2</i>                              |
| JSR102   | <i>MATa-inc lys2:: GAL-HO-LYS2 SPC105::spc105<sup>GLC7-RASA-NT</sup>-URA3</i>                                      |
| JSR113   | <i>MATa-inc lys2:: GAL-HO-LYS2 SPC105::spc105<sup>glc7cat-RASA-NT</sup>-URA3</i>                                   |
| JSR112   | <i>MATa-inc lys2:: GAL-HO-LYS2 SPC105::spc105<sup>GLC7-SPC105-NT</sup>-URA3</i>                                    |
| JSR114   | <i>MATa-inc lys2:: GAL-HO-LYS2 SPC105::spc105<sup>glc7cat7-SPC105-NT</sup>-URA3</i>                                |
| JSR128   | <i>MATa-inc lys2:: GAL-HO-LYS2 SPC105::spc105<sup>GLC7-WT-NT</sup>-URA3 mad2::KanMX his3::TUB1-GFP-HIS3 ADE2</i>   |
| JSR105   | <i>MATa-inc lys2::GAL-HO-LYS2 Glc7-spc105-RASA</i>                                                                 |
| JSR105-1 | <i>MATa-inc lys2::GAL-HO-LYS2 SPC105</i>                                                                           |
| JSR106   | <i>MATa-inc lys2 leu2-Δ101::URA3::leu2-Δ102</i>                                                                    |
| JSR107   | <i>MATa-inc lys2 leu2-Δ101::URA3::leu2-Δ102 GLC7-spc105<sup>RASA</sup></i>                                         |
| JSR127   | <i>MATa-inc lys2:: GAL-HO-LYS2 SPC105::spc105<sup>GLC7-SPC105-NT</sup>-URA3 his3::TUB1-GFP-HIS3 ADE2</i>           |

**Table S2. Yeast Strains Used in This Study**

All strains are W303 background. Asterisks indicates either *LYS2* or *lys2::GAL-HO-LYS2*.

## **Supplemental Experimental Procedures**

### **Plasmids and Constructs**

cDNA encoding *Xenopus tropicalis* KNL1 was purchased from Open Biosystems (IMAGE clone 7794105) and the full-length sequence was determined (Genbank Accession JF804775). MBP-PP1 $\gamma$  was made by cloning PP1 $\gamma$  from a *X. laevis* cDNA library into pMAL-c4g using the *Bam*HI and *Hin*DIII sites. KNL1<sup>1-100</sup>-FLAG was made by cloning KNL1 from a cDNA library into pGEX-6p2 using the *Bam*HI and *Eco*RI sites and inserting a C-terminal FLAG tag by PCR. KNL1<sup>1-300</sup> was made by splicing the endogenous *Eco*R1 site in KNL1 at residue 300 and the *Eco*R1 site in the polylinker. All point mutants were made using Quikchange site-directed mutagenesis (Agilent). For primers used see table S1.

### **Recombinant Proteins**

All proteins were expressed in BL-21 rosetta cells. For MBP-PP1 $\gamma$ : protein was purified on Amylose Resin according to manufacturers instructions (NEB), and dialyzed into PP1 storage buffer (50 mM TRIS pH 8.0, 200 mM NaCl, 0.1 mM MnCl<sub>2</sub>, 0.1 mM EDTA, 5 mM DTT). For xKNL1<sup>1-100</sup>-FLAG: protein was purified on Glutathione Sepharose 4B and cleaved with precision protease according to manufacturers instructions (GE Healthcare), and dialyzed into sperm dilution buffer (5 mM HEPES pH 8.0, 150 mM sucrose, 100 mM KCl, 1mM MgCl<sub>2</sub>).

### **Generation of Peptide Antibodies**

Methods previously described [32] were followed. Peptides corresponding to the C termini of xPP1 (QSRPVTPPRNKNKQSK) were synthesized and conjugated to KLH, and polyclonal antibodies were raised in rabbits (PTG labs). Antibodies were affinity

purified using SulfoLink Coupling Gel (Pierce) according to the manufacturer's directions.

### **In Vitro Kinase Assay and Immunoprecipitation**

AuroraB-INCENP<sub>790-871</sub> (A gift from A. Kelly) (0.2  $\mu$ M) and KNL1<sup>1-100</sup>-FLAG (10  $\mu$ M) were incubated for 30 minutes at 20°C in kinase buffer (20 mM HEPES, 150 mM NaCl, 10 mM MgCl<sub>2</sub>, 1 mM DTT, 1 mM MnCl<sub>2</sub>, 0.025% Tween-20) with either 1 mM ATP or 30  $\mu$ M ATP plus 0.02  $\mu$ M <sup>32</sup>P-ATP (approx. 6000 Ci/mmol).

*In vitro* immunoprecipitation was performed in binding buffer (BB = PBS, 0.01% NP-40, 0.1 mg/ml BSA, 0.25 mM TCEP, 10 % glycerol). 5  $\mu$ l of an *in vitro* kinase reaction (see above) was added to 10  $\mu$ l of anti-FLAG M2 agarose (Sigma) in 50  $\mu$ l TBS and incubated for 30 minutes at room temperature. The agarose was washed 2 times in TBS, 2 times in BB, resuspended in BB with 1  $\mu$ M MBP-PP1 $\gamma^{cat}$ , and incubated 2 hours at 4°C. Beads were washed 3 times in BB and eluted with SDS sample buffer.

### **Immunoprecipitation in *Xenopus laevis* Egg Extracts**

Anti-PP1 antibodies (see above) were crosslinked to protein A Dynabeads (Invitrogen) using BS<sup>3</sup> according to the manufacturer's directions (Pierce). GFP, PP1, and KNL1<sup>1-300</sup> were translated and <sup>35</sup>S-labeled in rabbit reticulocyte lysate with SP6 RNA polymerase according to manufacturer's directions (Promega). Proteins were added to CSF extracts prepared from *Xenopus laevis* eggs [33] (1/10 of total extract volume, approx 1:1:6 PP1:GFP:KNL1<sup>1-300</sup> by volume) and incubated for 1 hour at 20°C, then added to an equal volume of antibody crosslinked beads and incubated for 30 minutes at 4° C. Beads were washed 6 times with PBS + 0.1 % triton and eluted with SDS sample buffer. <sup>35</sup>S-labeled labeled proteins were imaged and quantified using a phosphorimager.

## **Immunoblots**

The antibodies anti- MYC 9E10 (Santa Cruz), anti- Pgk1 (Invitrogen), anti- Pds1 (a gift from A. Rudner), anti- Mad1 (a gift from K. Hardwick) were used. Primary antibodies were diluted in Blocking Buffer (Li-Cor) + 0.05% Tween-20. IRDye 800 goat anti-rabbit or donkey anti-goat or IRDye 680 goat anti-mouse secondary antibodies were used according to manufacturers instructions. Blots were detected using the Odyssey Infrared Imaging System (Li-Cor). For figure 2G, proteins were resolved on a low crosslinking SDS-polyacrylamide gel (8%; acrylamide to bisacrylamide ratio 33.5:0.3).

## **Yeast Strains**

All strains are derivative of the W303 background, see table S2. *RVAF-NT* and *RASA-NT* constructs were synthesized with a *SalI* site in the promoter for integrating (Epoch Biolabs) and cloned into pRS406 [6] using the *SacII* and *KpnI* sites. For *WT-NT*, the *RVAF* mutation was eliminated using site-directed mutagenesis. For *Glc7* fusion constructs: An *AscI* site and a linker (GDGAGL) were inserted into the *WT-NT* or *RASA-NT* plasmids via PCR, *GLC7* was PCR amplified from genomic DNA and inserted into the *AscI* site, and the *SalI* site in *GLC7* was eliminated and the catalytically dead mutation D94A was created using site directed mutagenesis.

## **HGR and Single-Cell Colony Assay**

For live cell imaging and bulk culture genotyping, parent cells were grown to log phase before *GAL-HO* induction for 6 hours, the time needed to guarantee cells have performed recombination [6]. For the single cell colony assay, *spc105<sup>NT</sup>* strains were streaked on galactose plates and left for 6 hours at 30°C. Single budded cells were isolated and allowed to grow to colonies. In cases where macroscopic colonies formed, DNA was

isolated by standard protocol. The genotype was assessed by PCR amplification and restriction digest with an enzyme specific to each mutation.

### **Disomy III Assay**

Cells containing *ura3-52* and *leu2-Δ101::URA3::leu2-Δ102* at the endogenous *LEU2* locus on chromosome 3 [21] were grown in unselective YEPD for 48 hours, diluted appropriately and plated on selective medium lacking leucine, or that lacking both leucine and uracil. Percent disomy III is defined as frequency of Leu<sup>+</sup>, Ura<sup>+</sup> cell formation.

### **Time Courses**

Cells were arrested in G1 in YEPD + 10 nM  $\alpha$ -factor for 1.5 (30°C) or 2 (23°C) hours. For tet<sup>off</sup>-CDC20-127 experiments, 10  $\mu$ g/ml doxycycline (sigma-aldrich) was added for 2 hours. Cells were washed into YEPD with doxycycline and without  $\alpha$ -factor. For all others, after arrest cells were washed into YEPD without  $\alpha$ -factor at 30°C or the indicated temperatures. Samples for Western blotting were prepared as previously described [34] every 15 minutes for 2 hours after release, and 10 nM  $\alpha$ -factor was added 45 minutes after release to prevent cells from entering the next cell cycle.

### **Nocodazole Block**

For Figures 4 B, C, asynchronous cultures grown to log phase in YEPD were treated with 15  $\mu$ g/ml nocodazole and 10  $\mu$ g/ml benomyl or an equivalent amount of DMSO for 3 hours, and cell morphology was counted. Cells were then washed 2 times in YEPD, plated onto YEPD, and colony formation was counted after 48 hours. For Figure S2F, cells were arrested in G1 in YEPD + 10 nM  $\alpha$ -factor for 1.5 hours, then washed into

YEPD without  $\alpha$ -factor with 15  $\mu\text{g/ml}$  nocodazole and 10  $\mu\text{g/ml}$  benomyl or an equivalent amount of DMSO, and cell morphology was counted every hour.

### **Time-Lapse Microscopy**

A previously described method [35] was used.

### **Supplemental References**

32. Field, C.M., Oegema, K., Zheng, Y., Mitchison, T.J., and Walczak, C.E. (1998). Purification of cytoskeletal proteins using peptide antibodies. *Methods Enzymol* 298, 525-541.
33. Murray, A.W. (1991). Cell Cycle Extracts. *Meth. Cell Biol.* 36, 573-597.
34. Drapkin, B.J., Lu, Y., Procko, A.L., Timney, B.L., and Cross, F.R. (2009). Analysis of the mitotic exit control system using locked levels of stable mitotic cyclin. *Mol Syst Biol* 5, 328.
35. Bean, J.M., Siggia, E.D., and Cross, F.R. (2006). Coherence and timing of cell cycle start examined at single-cell resolution. *Mol Cell* 21, 3-14.
